# Supplementary material for: Optimization, Characterization, and Comparison of Two Luciferase-Expressing Mouse Glioblastoma Models
Source: Preprints.org preprint supplement (doi:10.20944/preprints202403.1052.v1), 2024-03-19
Supplement: Supplementary file 3 [file supplementary]

Archive with 2 entries (2 files):
- SUPPL FIGS_BC_Model_240307_FINAL.pdf
- __MACOSX/._SUPPL FIGS_BC_Model_240307_FINAL.pdf
